# Supplementary material for: Engineering hollow carbon spheres: directly from solid resin spheres to porous hollow carbon spheres via air induced linker cleaving
Source: Royal Society of Chemistry journal article supplement (doi:10.1039/d1nr03392a), 2021-01-01
Supplement: d1nr03392a1.pdf [file d1nr03392a1.pdf]

## Supporting Information (SI)

### **Engineering hollow carbon spheres: Directly from solid resin spheres to porous hollow carbon spheres via air induced linker cleaving**

Neng Li<sup>a</sup>, Bihui Qin<sup>a</sup>, Hongfei Kang<sup>a</sup>, Nana Cai<sup>a</sup>, Suping Huang<sup>b</sup>, Qi Xiao<sup>a\*</sup>

<sup>a</sup> School of Minerals Processing and Bioengineering, Central South University, Changsha 410083, China.

<sup>b</sup> State Key Lab of Powder Metallurgy, Central South University, Changsha 410083, China.

\*Corresponding author: Qi Xiao

E-mail: xiaoqi88@csu.edu.cn.

Tel: +86-731-88830543. Fax: +86-731-88879815.

## Section 1

### 1.1. Materials Characterization

The XRD patterns of the sample was recorded with a DX-2700 X-ray powder diffractometer (XRD) with Cu K $\alpha$  radiation ( $\lambda = 1.54056\text{\AA}$ ). The morphologies of the samples were characterized with scanning electronic microscopy (SEM, ZEISS Signa 300) and transmission electron microscope (TEM, FEI Tecnai G2 f20 s-twin 299Kv). The X-ray photoelectron spectra (XPS) measurements were performed on a VG Scientific ESCA-LAB Mark II spectrometer equipped with two ultrahigh vacuum (UHV) chambers using Al K $\alpha$  radiation (1486.6 eV) to investigate the surface properties. The binding energy of the XPS spectra is calibrated with the reference to the C 1s peak (284.8 eV) arising from adventitious carbon. The nitrogen adsorption and desorption isotherms were collected at 77 K on a Micromeritic ASAP 2460 instrument. The specific surface areas were calculated using the Brunauer-Emmett-Teller (BET) equation and the pore size distributions were calculated by applying the Barrett-Joyner-Halenda (BJH) method using the desorption branch of the isotherms. The Fourier transform infrared (FTIR) spectroscopy analysis was conducted on a Nicolet iS50 FTIR spectrometer. The Raman spectrum analysis was conducted on a Labram HR800 Laser Raman Spectroscopy made by Jobin Yvon, France, using the 632.8 nm He-Ne ion laser as an excitation source. The laser power on the sample was 10 mW.

### 1.2. Electrochemical Measurement

Lithium metal was used as the anode electrode. The electrolyte composition contains 1M lithium bistrifluoromethanesulfonylimide (LITFSI) and 0.1 M lithium nitrate (LiNO<sub>3</sub>) salts dissolved in a mixed solvent of 1,2-dimethoxyethane (DME) and 1,3-dioxolane (DOL) (volume ratio 1:1). The electrochemical measurements were performed with 2025 coin-type cells. The cells were assembled in an Ar-filled glovebox with moisture and oxygen concentrations below 0.1 ppm.

The charge/discharge measurements were conducted on Neware BTS4000 battery test system (Shenzhen, China) in a voltage range between 1.7 V and 2.8 V. Cyclic voltammetry (CV) measurements were measured by using the Gamry Interface 1000T electrochemical workstation at different scan rates in the voltage range of 1.7-2.8 V versus Li/Li<sup>+</sup>, and the electrochemical impedance spectroscopy(EIS) measurements were performed on the same of electrochemical workstation by applying a sine wave with amplitude of 5.0mV over the frequency range from 100KHz to 0.1Hz.

## Section 2

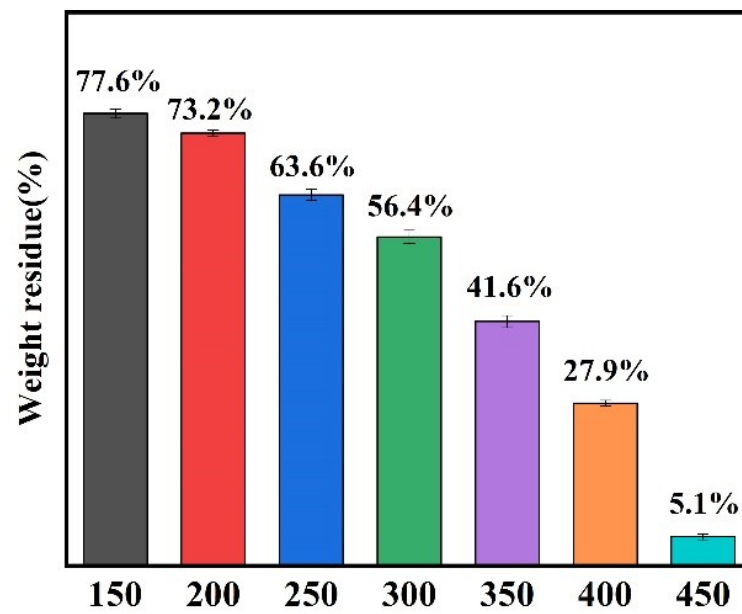

Fig.S1. The weight residue of APF spheres calcined at different temperatures in air.

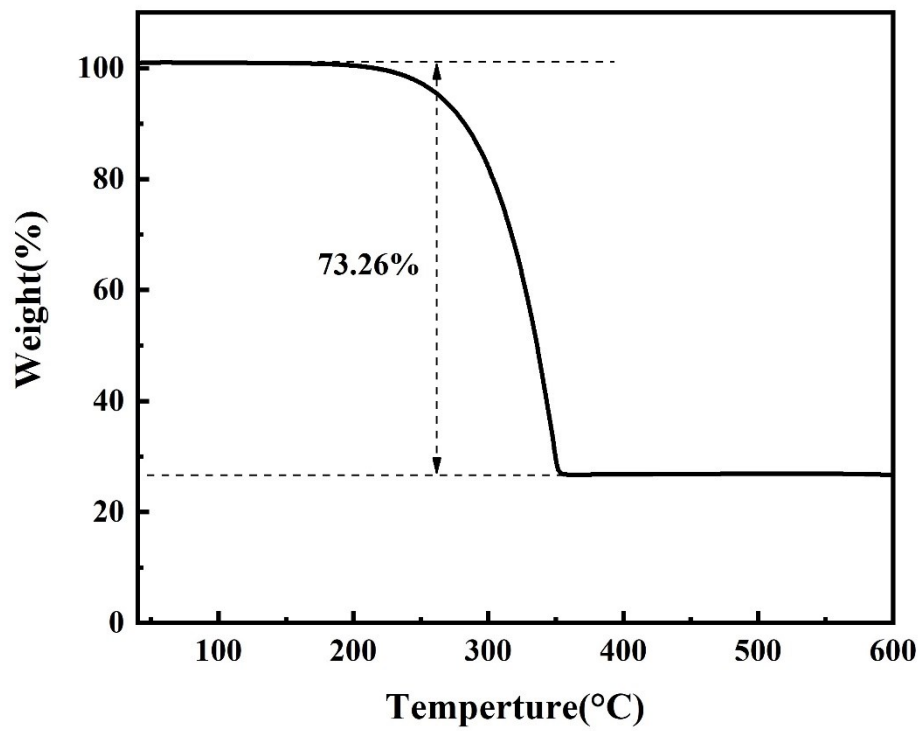

Fig. S2. TG curve of the Super P/S composites under N<sub>2</sub> atmosphere with a heating rate of 5°C/min.

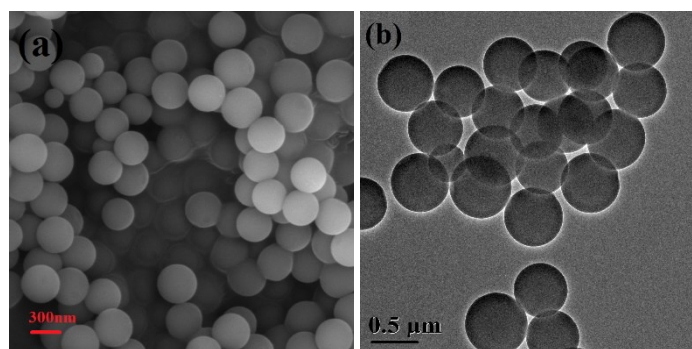

**Fig. S3. (a) SEM, and (b) TEM images of solid APF spheres.**

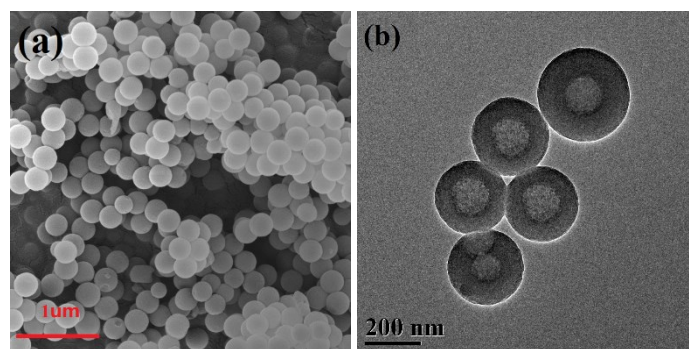

**Fig. S4.** (a) SEM, and (b) TEM images of HCS/400 spheres.

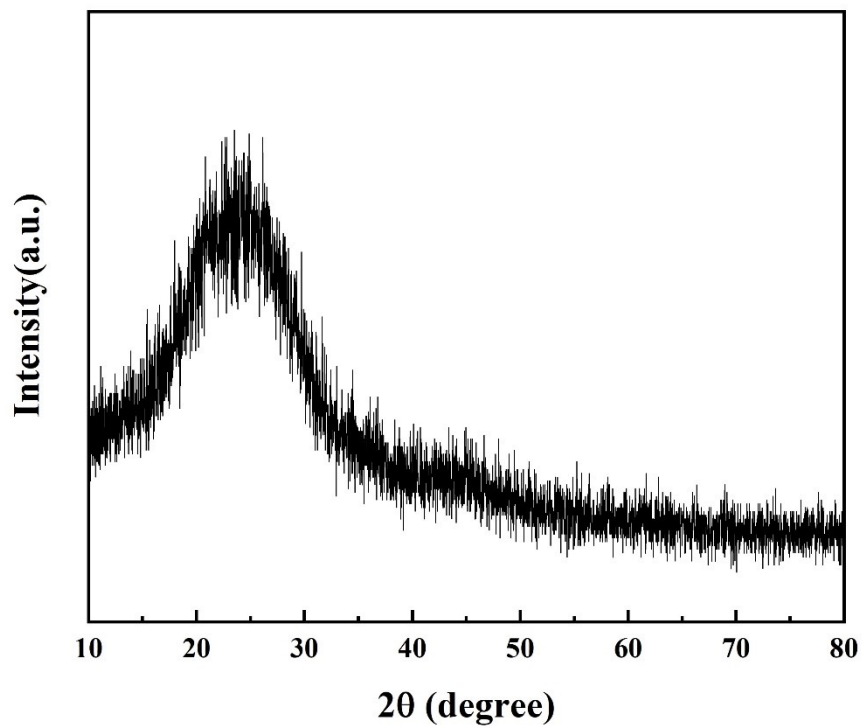

**Fig. S5. XRD pattern of HCS/400.**



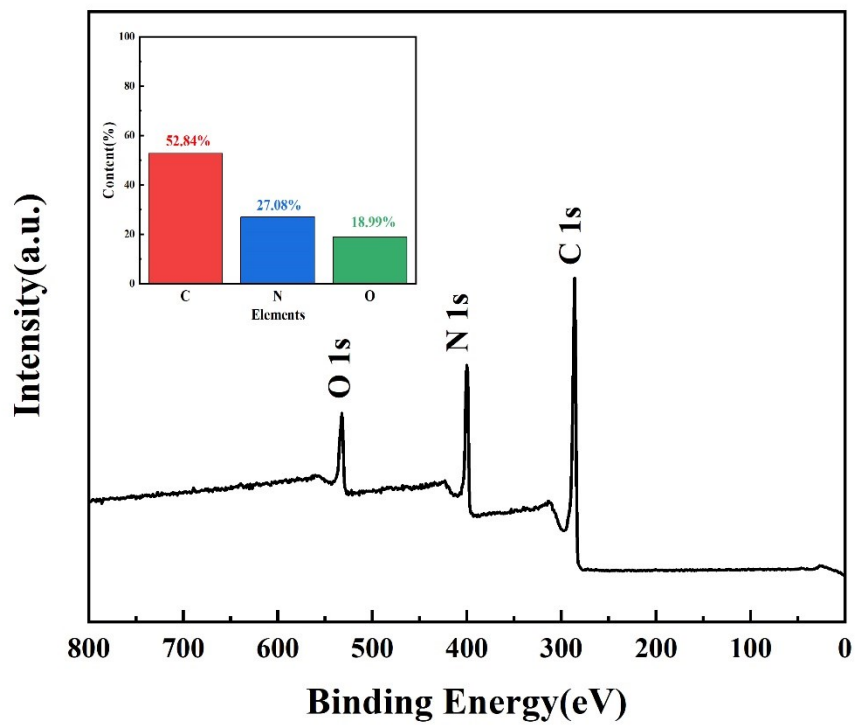

Fig. S6: XPS pattern of HCS/400.

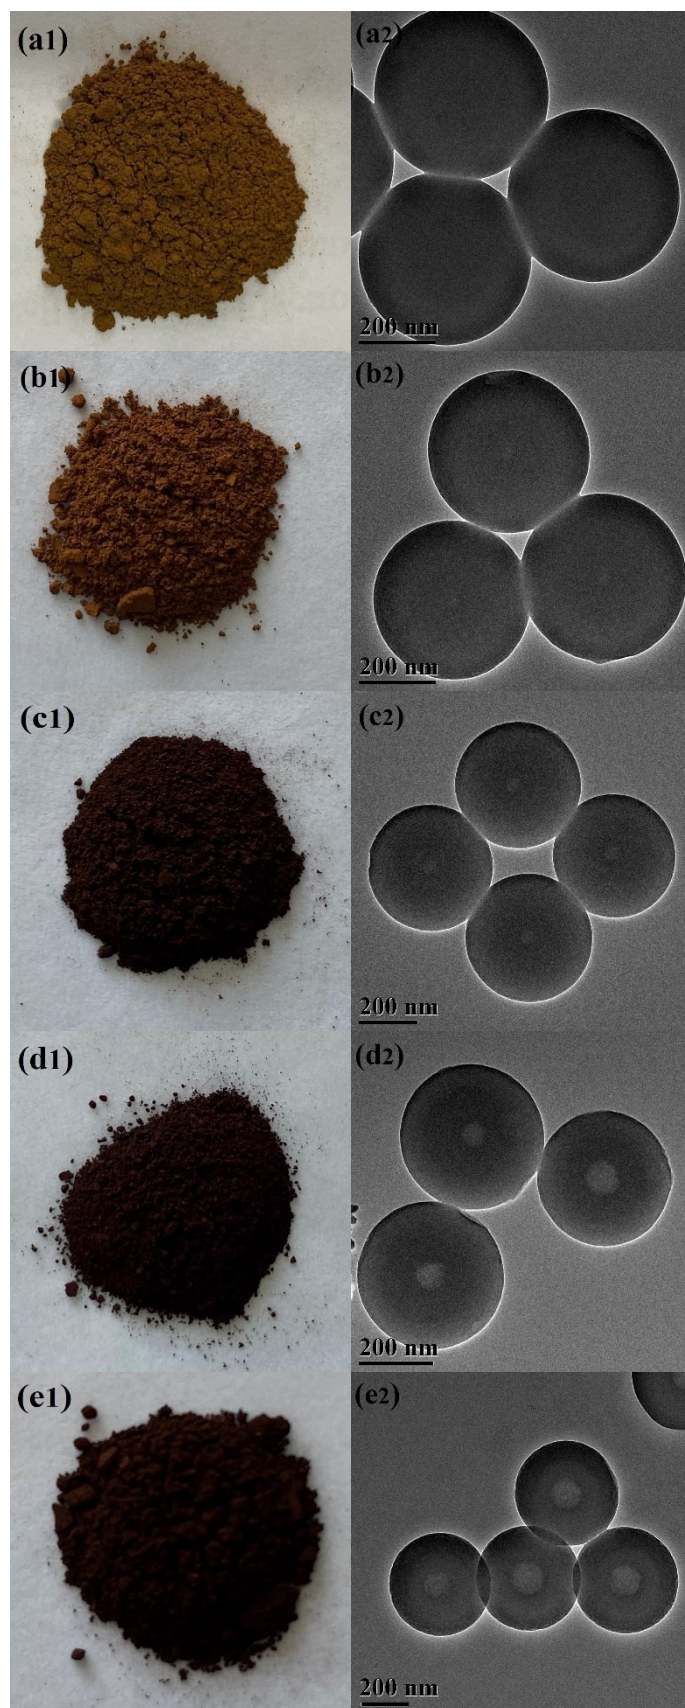

**Fig. S7: Photograph and TEM images of APF spheres at different oxidative linker cleaving temperature under air atmosphere: a) 150°C, b) 200°C, c) 250°C, d) 300°C, e) 350°C.**

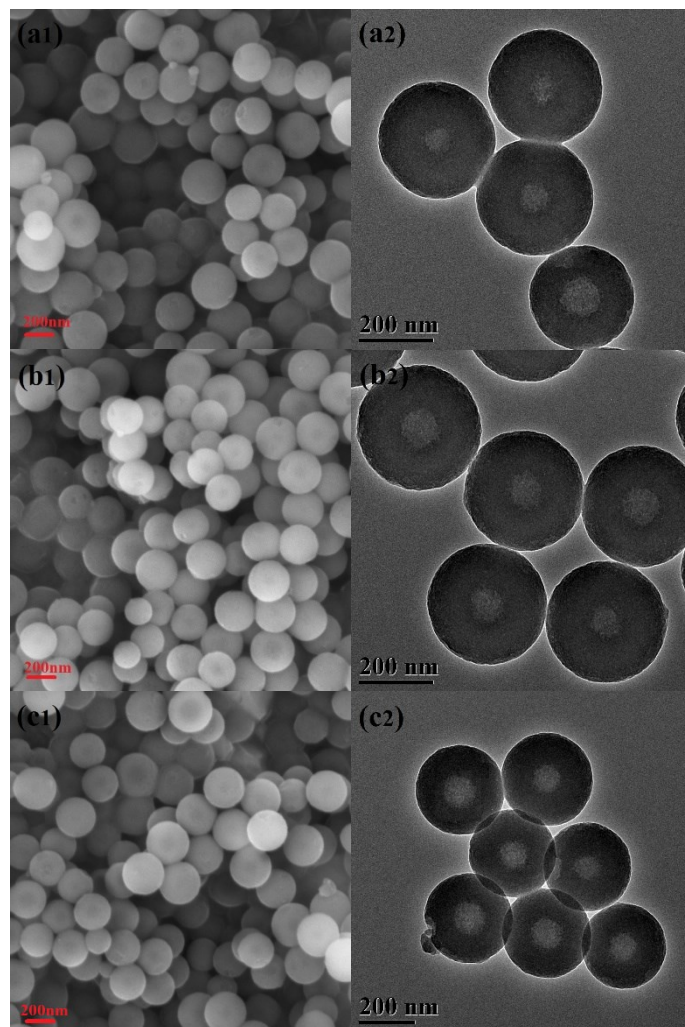

**Fig. S8. SEM and TEM images of APF spheres at different oxidative linker cleaving time under air atmosphere at 400°C: a) 10min, b) 20min, c) 40min.**

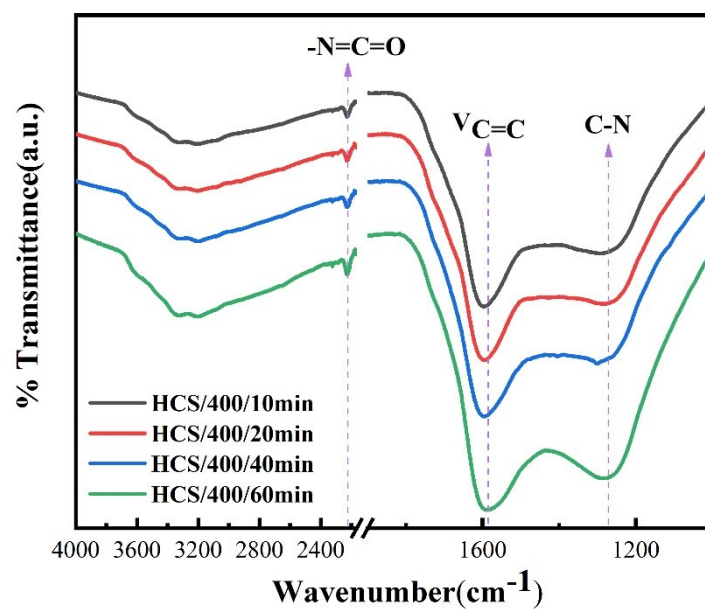

**Fig. S9.** The Fourier transform infrared (FTIR) spectrum of solid APF spheres synthesized at different oxidative linker cleaving time under air atmosphere at 400°C.

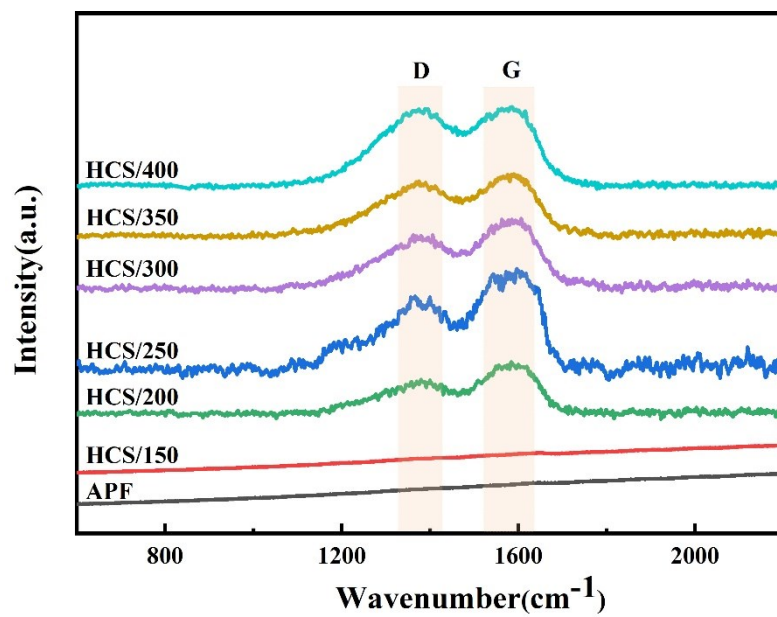

**Fig. S10.** The Raman diagram of solid APF spheres synthesized at different oxidative linker cleaving temperature under air atmosphere.

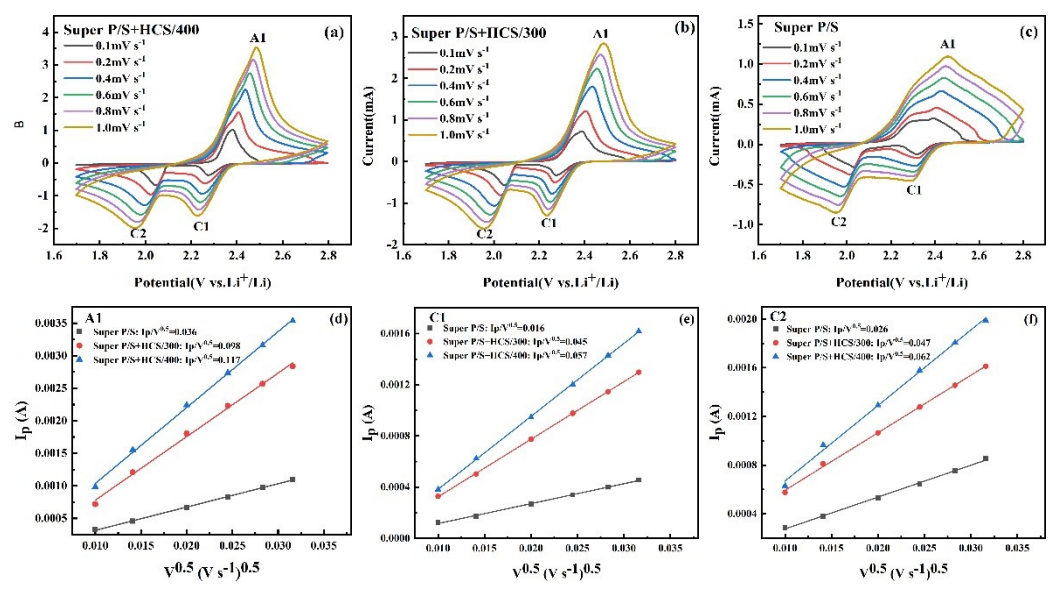

**Fig.S11: CV curves of LSBs with a) Super P/S+HCS/400, b) Super P/S+HCS/300, and c) Super P/S at different scan rate. Points and fitted lines of CV peak current versus square root scan rates for d) A1, e) C1, and f) C2 peaks.**

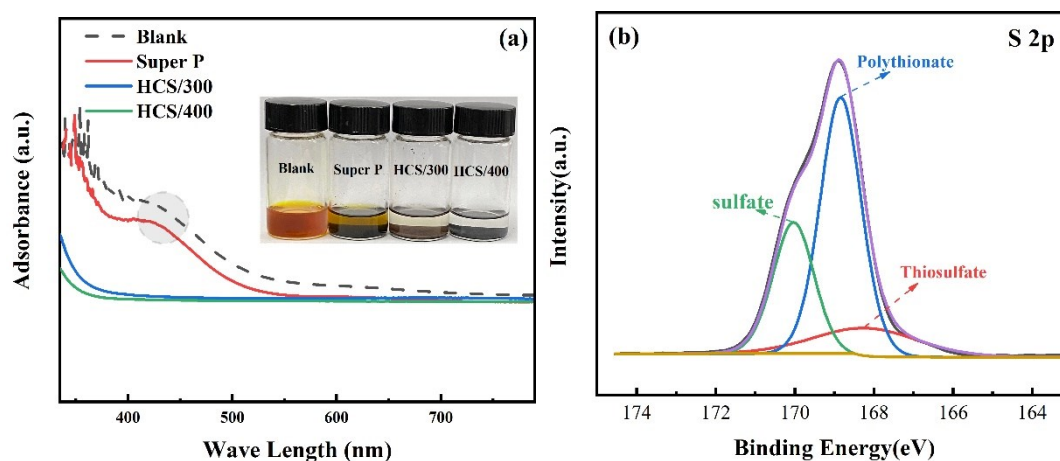

**Fig.S12. (a) UV-vis spectra of  $\text{Li}_2\text{S}_n$  solutions with DOL/DME solvents (1:1, v/v) and those after adsorption by conductive acetylene black (Super P), HCS/300 and HCS/400, insets: photographs of blank solution and the solutions after adding conductive acetylene black (Super P), HCS/300 and HCS/400. (b) XPS spectra of S 2p for  $\text{Li}_2\text{S}_n$  solutions after adsorption by HCS/400.**

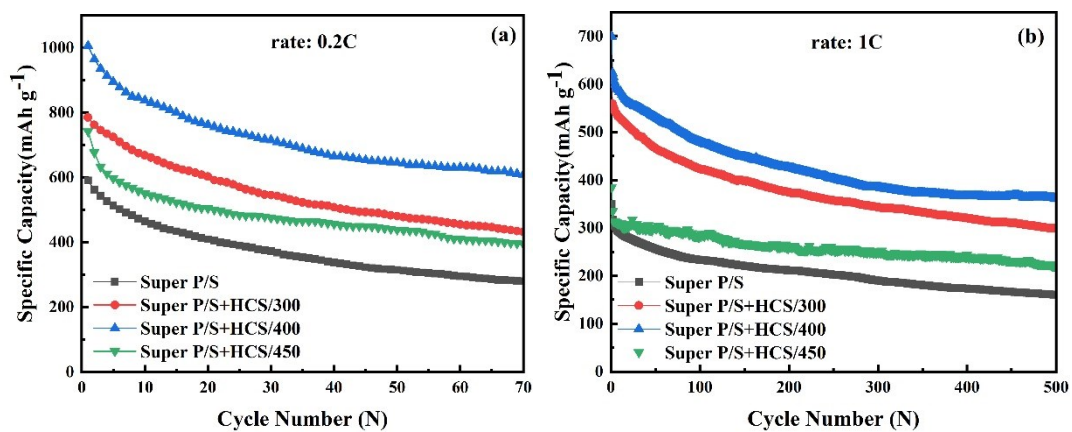

**Fig.S13. (a) Cycling performances of at 0.2 C for 70 cycles; (b) Cycling performances and Columbic efficiency at 1C for 500 cycles of Super P/S, Super P/S+HCS/300, Super P/S+HCS/400, Super P/S+HCS/450 cathode.**



**Table S1.** HCSs outer diameter, shell thickness and hollow size of oxidative linker cleaving at different temperatures in air atmosphere.

| Samples | Outer Diameters<br>(nm) | Shell Thickness<br>(nm) | Hollow Size<br>(nm) |
|---------|-------------------------|-------------------------|---------------------|
| APF     | ~600                    | ~300                    | 0                   |
| HCS/150 | ~444                    | ~222.22                 | 0                   |
| HCS/200 | ~438                    | ~209                    | ~20                 |
| HCS/250 | ~414                    | ~178                    | ~57                 |
| HCS/300 | ~400                    | ~162                    | ~76                 |
| HCS/350 | ~340                    | ~107                    | ~126                |
| HCS/400 | ~325                    | ~77                     | ~171                |

**Table S2.** HCSs outer diameter, shell thickness and hollow size of oxidative linker cleaving at different time for 400°C under air atmosphere

| Time  | Outer Diameters<br>/nm | Shell Thickness<br>/nm | Hollow Size<br>/nm |
|-------|------------------------|------------------------|--------------------|
| 10min | 360                    | 130                    | 100                |
| 20min | 340                    | 120                    | 100                |
| 40min | 330                    | 103                    | 124                |

**Table S3:** The change of chemical functional groups of APF and HCS at different thermal treatment temperature in air (Strong, Weak, and No).

| Wavenumber<br>(cm <sup>-1</sup> ) | Chemical<br>functional<br>group      | APF | HCS/<br>150 | HCS/<br>200 | HCS/<br>250 | HCS/<br>300 | HCS/<br>350 | HCS/<br>400 |
|-----------------------------------|--------------------------------------|-----|-------------|-------------|-------------|-------------|-------------|-------------|
| ~2934<br>~2853                    | -CH <sub>2</sub> -                   | S   | W           | N           | N           | N           | N           | N           |
| ~2226                             | -N=C=O                               | N   | N           | N           | W           | W           | S           | S           |
| ~1621<br>~1451                    | C=C<br>stretching for<br>phenol ring | S   | S           | S           | S           | S           | S           | S           |
| ~1283                             | C-N                                  | S   | S           | S           | S           | S           | S           | S           |
| ~1239                             | Ar-O-C                               | S   | W           | N           | N           | N           | N           | N           |
| ~1186<br>~1117                    | C-O-C                                | S   | N           | N           | N           | N           | N           | N           |

**Table S4:** The integral intensity values of D and G peaks of the obtained samples measured from Raman results.

| <b>Samples</b> | <b>I<sub>D</sub></b> | <b>I<sub>G</sub></b> | <b>I<sub>D</sub>/I<sub>G</sub></b> |
|----------------|----------------------|----------------------|------------------------------------|
| HCS/200        | 120034.7             | 247953.2             | 0.484                              |
| HCS/250        | 76603.1              | 140312.4             | 0.546                              |
| HCS/300        | 95652.8              | 131519.1             | 0.727                              |
| HCS/350        | 79253.4              | 104683.3             | 0.757                              |
| HCS/400        | 57692.3              | 65669.6              | 0.878                              |

**Table S5.** The redox peaks of the three cathode materials with the corresponding  $D_{Li^+}$ .

| S Cathode         | $D_{Li^+}$ of A1 peak<br>( $cm^2 S^{-1}$ ) | $D_{Li^+}$ of C1 peak<br>( $cm^2 S^{-1}$ ) | $D_{Li^+}$ of C2 peak<br>( $cm^2 S^{-1}$ ) |
|-------------------|--------------------------------------------|--------------------------------------------|--------------------------------------------|
| Super P/S+HCS/400 | $8.24 \times 10^{-9}$                      | $1.96 \times 10^{-9}$                      | $2.31 \times 10^{-9}$                      |
| Super P/S+HCS/300 | $5.78 \times 10^{-9}$                      | $1.22 \times 10^{-9}$                      | $1.33 \times 10^{-9}$                      |
| Super P/S         | $7.8 \times 10^{-10}$                      | $1.54 \times 10^{-10}$                     | $4.07 \times 10^{-10}$                     |

**Table. S6.** The comparisons of cyclic performance of Super P/S+HCS/400 cathode with other materials reported in the previous works

| Host material                                | cathode            | sulfur Content (wt%) | C-rate | Cycle number | Initial capacity (mAh g <sup>-1</sup> ) | Reversible capacity (mAh g <sup>-1</sup> ) | Ref.       |
|----------------------------------------------|--------------------|----------------------|--------|--------------|-----------------------------------------|--------------------------------------------|------------|
| conductive acetylene black                   | Super P/S +HCS/400 | 51.3%                | 0.2C   | 70           | 1006                                    | 647.8                                      | This paper |
| N doped hollow carbon spheres                | S/N-HCS            | 49%                  | 0.2C   | 50           | 1072                                    | 750.4                                      | [1]        |
| Functionalized N doped hollow carbon spheres | F-NHCS-S           | 59.2%                | 0.2C   | 100          | 827                                     | 549                                        | [2]        |
| N-doped hollow carbon nanospheres            | NMHC-2-S           | 65.4%                | 0.2C   | 100          | 1113                                    | 800                                        | [3]        |

## References:

- [1] Pei F, An T, Zang J, et al. From Hollow Carbon Spheres to N-Doped Hollow Porous Carbon Bowls: Rational Design of Hollow Carbon Host for Li-S Batteries[J]. *Advanced Energy Materials*, 2016, 6(8).
- [2] Li X, Pan Z, Li Z, et al. Functionalized N-doped hollow carbon spheres as sulfur host with enhanced electrochemical performances of lithium-sulfur batteries[J]. *Ionics*, 2019, 25(2): 503-511.
- [3] Zhou W, Wang C, Zhang Q, et al. Tailoring Pore Size of Nitrogen-Doped Hollow Carbon Nanospheres for Confining Sulfur in Lithium-Sulfur Batteries[J]. *Advanced Energy Materials*, 2015, 5(16).
